# Supplementary material for: Identification of novel tetrabromobisphenol A byproducts in industrial chemicals and the environment near a manufacturing site: an overlooked source of novel pollutants
Source: Royal Society of Chemistry journal article supplement (doi:10.1039/d5em00030k), 2025-01-01
Supplement: d5em00030k1.pdf [file d5em00030k1.pdf]

## Supporting Information

# Identification of novel tetrabromobisphenol A byproducts in industrial chemicals and environment near a manufacturing site: An overlooked source of novel pollutants

*Weihao Xu*<sup>1</sup>, *Xiaoxuan Han*<sup>1,2</sup>, *Yong Tian*<sup>1,\*</sup>, *Jiakui Liang*<sup>3</sup>, and *Yanfeng Zhang*<sup>3,\*</sup>

<sup>1</sup> School of Environmental & Municipal Engineering, Qingdao University of Technology, Qingdao 266033, China

<sup>2</sup> Research Center for Analytical Sciences, Department of Chemistry, College of Sciences, Northeastern University, Shenyang 110819, China

<sup>3</sup> Intelligent Policing Key Laboratory of Sichuan Province, Sichuan Police College, Luzhou 646000, China

\* Corresponding author:

Yong Tian, E-mail: [tianyong0987@163.com](mailto:tianyong0987@163.com); [tianyong@qut.edu.cn](mailto:tianyong@qut.edu.cn)

Yanfeng Zhang, E-mail: [zhyf@scpolicec.edu.cn](mailto:zhyf@scpolicec.edu.cn)

Number of pages: 35

Number of text: 1

Number of figures: 4

Number of tables: 16

Number of references: 4

## Contents:

|                                                                                                                                                                              |               |
|------------------------------------------------------------------------------------------------------------------------------------------------------------------------------|---------------|
| <b>Text S1.</b> Samples pretreatment. ....                                                                                                                                   | <b>S4</b>     |
| <b>Figure S1.</b> Sampling sites (1-33). ....                                                                                                                                | <b>S5</b>     |
| <b>Figure S2.</b> Chromatograms of TBBPA byproducts detected by HPLC-ITMS. ....                                                                                              | <b>S6</b>     |
| <b>Figure S3.</b> MS (left) and MS/MS (right) spectra of TBBPA byproducts (R1-R7) in industrial-grade TBBPA chemicals detected by HPLC-Orbitrap HRMS. ....                   | <b>S7</b>     |
| <b>Figure S4.</b> MS (left) and MS/MS (right) spectra of novel TBBPA byproducts (N1-N7) in industrial-grade TBBPA chemicals detected by HPLC-Orbitrap HRMS. ....             | <b>S8</b>     |
| <b>Table S1.</b> The gradient elution conditions of HPLC-ITMS. ....                                                                                                          | <b>S9</b>     |
| <b>Table S2.</b> The MS/MS conditions and fragmentation paths of TBBPA byproducts (R1-R7 and N1-N7) in industrial-grade TBBPA chemicals detected by HPLC-ITMS. ....          | <b>S10-13</b> |
| <b>Table S3.</b> The gradient elution conditions of HPLC-Orbitrap HRMS. ....                                                                                                 | <b>S14</b>    |
| <b>Table S4.</b> The MS/MS conditions and fragmentation paths of TBBPA byproducts (R1-R7 and N1-N7) in industrial-grade TBBPA chemicals detected by HPLC-Orbitrap HRMS. .... | <b>S15-17</b> |
| <b>Table S5.</b> The analytical performance of TriBP and TriBBPA in environmental samples detected by HPLC-Orbitrap HRMS. ....                                               | <b>S18</b>    |
| <b>Table S6.</b> Chemical information of TBBPA byproducts identified in industrial-grade TBBPA chemicals. ....                                                               | <b>S19-21</b> |
| <b>Table S7.</b> Single-point energies of possible structures of R7. ....                                                                                                    | <b>S22</b>    |
| <b>Table S8.</b> The results of TBBPA byproducts analyzed by HPLC-Orbitrap HRMS. ....                                                                                        | <b>S23</b>    |
| <b>Table S9.</b> Quantitative and semi-quantitative concentrations ( $\mu\text{g g}^{-1}$ ) of byproducts in industrial-grade TBBPA chemicals. ....                          | <b>S24</b>    |

|                                                                                                                                                                      |               |
|----------------------------------------------------------------------------------------------------------------------------------------------------------------------|---------------|
| <b>Table S10.</b> Concentrations of TBBPA byproducts in river water (ng L <sup>-1</sup> ), soil (ng g <sup>-1</sup> dw), and sediment (ng g <sup>-1</sup> dw). ..... | <b>S25-28</b> |
| <b>Table S11.</b> The prediction results of carcinogenicity (binary and trinary), eye corrosion, eye irritation, and acute oral toxicity. ....                       | <b>S29</b>    |
| <b>Table S12.</b> The prediction results of ames mutagenesis, hERG, micronuclear, hepatotoxicity, and skin sensitization. ....                                       | <b>S30</b>    |
| <b>Table S13.</b> The prediction results of respiratory, reproductive, mitochondrial, acute oral toxicity, and nephrotoxicity. ....                                  | <b>S31</b>    |
| <b>Table S14.</b> The prediction results of estrogen, androgen, thyroid, glucocorticoid receptor binding, and aromatase binding. ....                                | <b>S32</b>    |
| <b>Table S15.</b> The prediction results of PPAR gamma, biodegradation, honey bee, crustacea aquatic, and fish aquatic toxicity. ....                                | <b>S33</b>    |
| <b>Table S16.</b> Calculated physical-chemical constants of TBBPA byproducts. ....                                                                                   | <b>S34</b>    |
| <b>References</b> .....                                                                                                                                              | <b>S35</b>    |

### **Text S1. Samples pretreatment.**

River water samples (200 mL) were filtered through a 0.45 µm glass fiber membrane filter, and added the isotope-labeled surrogate ( $^{13}\text{C}_{12}$ -BPA, 5 ng). The water samples were liquid-liquid extracted four times with 160 mL DCM. The combined extracts were rotary evaporated and re-dissolved in 1 mL of MeOH.<sup>1</sup>

The soil/sediment samples (3.0 g, dry weight), which had been mixed with isotope-labeled surrogate ( $^{13}\text{C}_{12}$ -BPA, 5 ng), were extracted with DCM (25 mL) for 30 min by ultrasonic extraction three times. The extracts were combined, concentrated with a rotary evaporator, solvent exchanged to 1 mL of DCM/hexane (1/1, v/v), and further cleaned by gel permeation chromatography (GPC, biobeads S-X3, 20 × 2.0 cm i.d.). Then, the GPC column was eluted with DCM/hexane (1/1, v/v). The initial 15 mL eluted were discarded, and the following 75 mL were collected and concentrated by rotary evaporator. The purified substances were re-dissolved in MeOH/ultrapure water (5%, v/v) and further purified by HLB (Waters Oasis, 200 mg, 6cc) solid phase extraction cartridges. The HLB cartridges were pre-conditioned with 5 mL MeOH and 5 mL MeOH/ultrapure water (5%, v/v). After loading sample solution, the cartridges were washed with 5 mL MeOH/ultrapure water (5%, v/v) to eliminate interferences, then vacuumed for 2 min to remove most of the water. Finally, the cartridges were eluted with 12 mL of MeOH, and concentrated to 1 mL before HPLC-MS/MS analysis.<sup>2,3</sup>

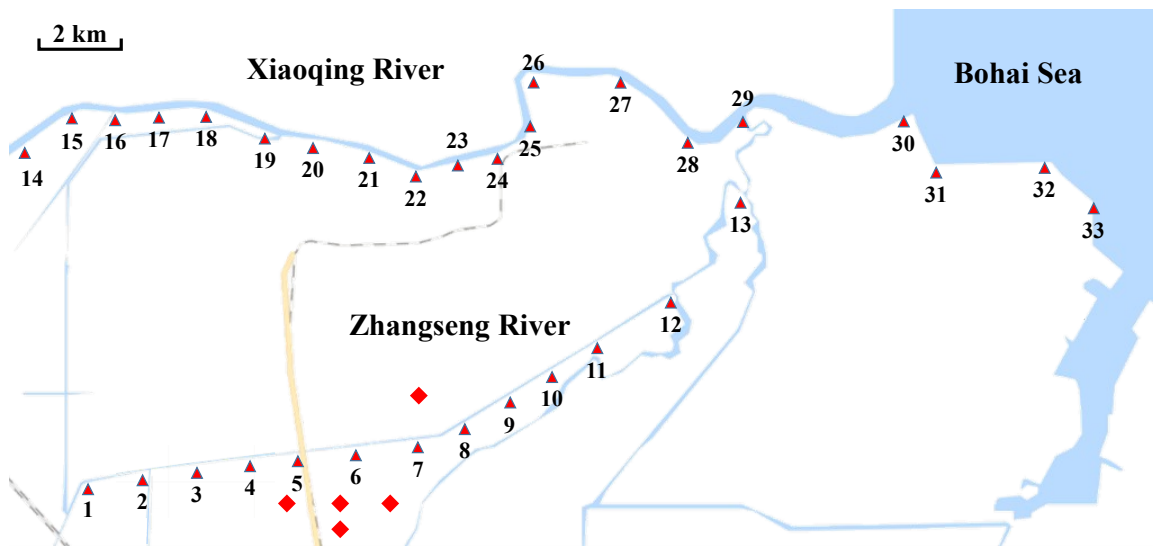

Figure S1. Sampling sites (1-33).<sup>4</sup>

▲: sampling site; ◆: the location of brominated flame retardant plant.

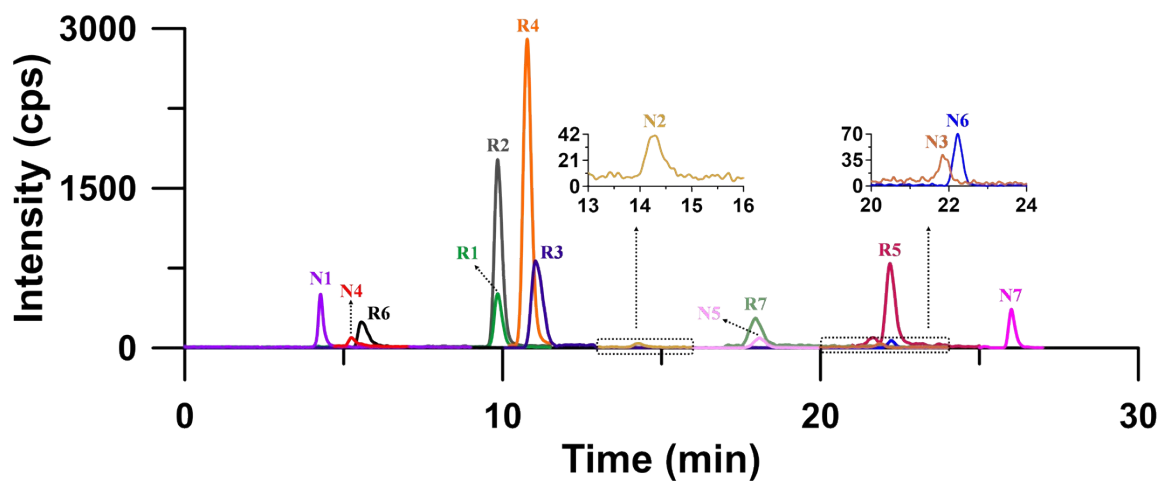

**Figure S2.** Chromatograms of TBBPA byproducts detected by HPLC-ITMS (Chemical information of R1-R7 and N1-N7 were listed in Table S2 and S6).

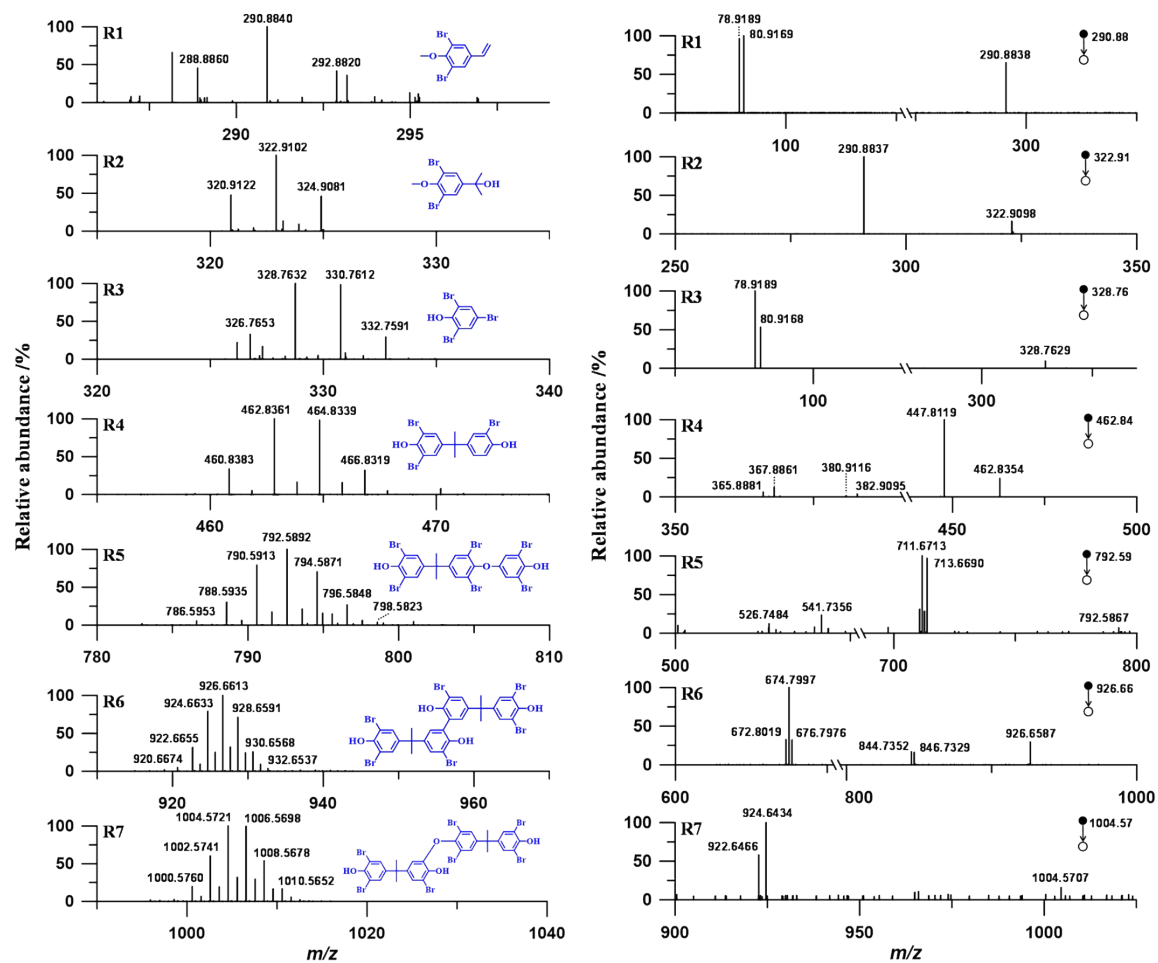

**Figure S3.** MS (left) and MS/MS (right) spectra of TBBPA byproducts (R1-R7) in industrial-grade TBBPA chemicals (Nantong Reform Petrochemical Co., Ltd.) detected by HPLC-Orbitrap HRMS.

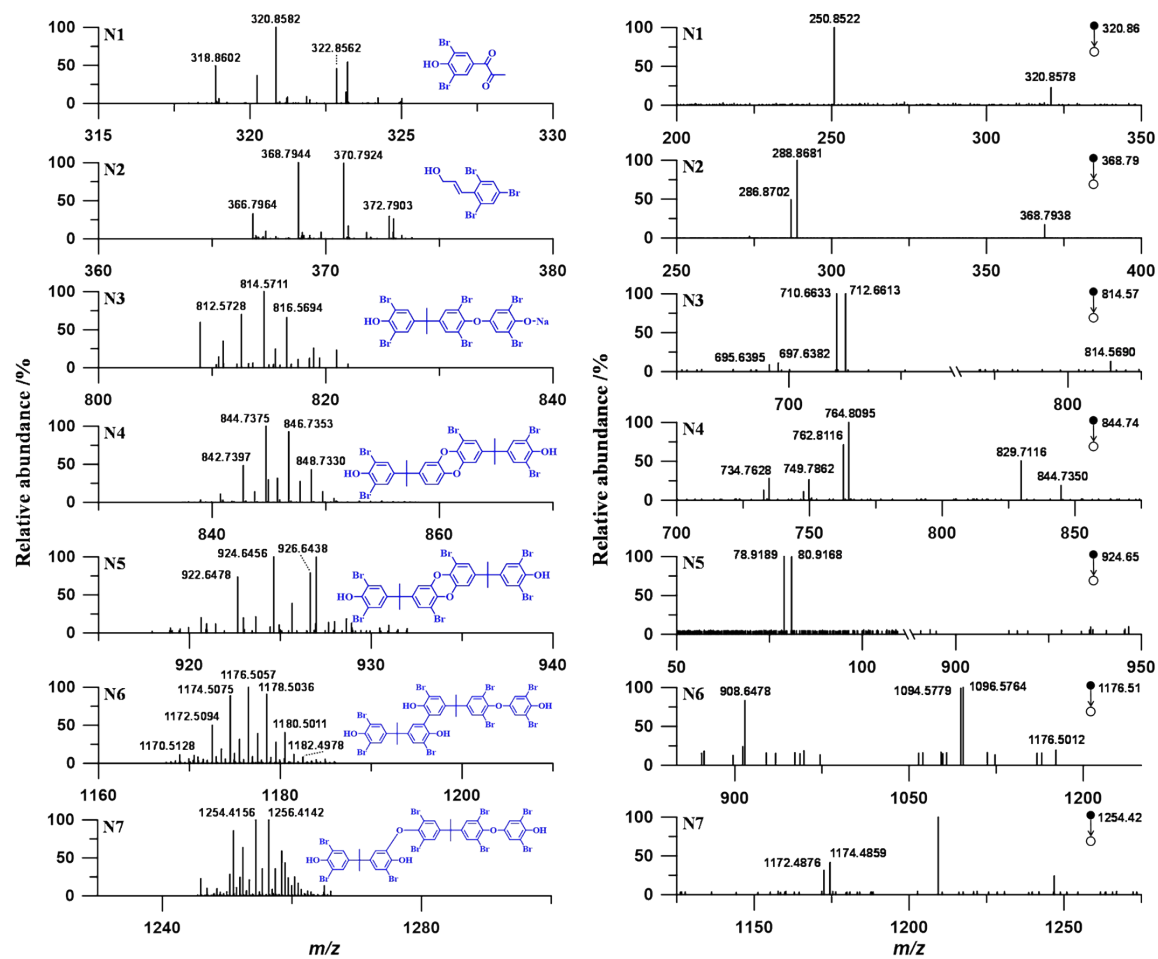

**Figure S4.** MS (left) and MS/MS (right) spectra of novel TBBPA byproducts (N1-N7) in industrial-grade TBBPA chemicals (Shandong Duoju Chemical Co., Ltd. and Foshan Nanhai Yincheng Trading Co., Ltd.) detected by HPLC-Orbitrap HRMS.



**Table S1.** The gradient elution conditions of HPLC-ITMS.

| Time (min) | MeOH (%) | Ultrapure water (%) |
|------------|----------|---------------------|
| 0          | 90       | 10                  |
| 8          | 90       | 10                  |
| 11         | 100      | 0                   |
| 36         | 100      | 0                   |
| 39         | 90       | 10                  |
| 56         | 90       | 10                  |

**Table S2.** The MS/MS conditions and fragmentation paths of TBBPA byproducts (**R1-R7** and **N1-N7**) in industrial-grade TBBPA chemicals detected by HPLC-ITMS.

| Precursor ions ( <i>m/z</i> ) | Retention time (min) | CID <sup>a</sup> collision energy (%) | Product ions ( <i>m/z</i> ) | Lost fragments                                         |
|-------------------------------|----------------------|---------------------------------------|-----------------------------|--------------------------------------------------------|
| R1 (290.8)                    | 9.84                 | 29                                    | 276.9                       | •CH <sub>2</sub> •                                     |
|                               |                      |                                       | 260.9                       | CH <sub>2</sub> O                                      |
|                               |                      |                                       | 247.1                       | CH <sub>2</sub> =CH-OH                                 |
|                               |                      |                                       | 236.9                       | [•CHO, •C <sub>2</sub> H]                              |
|                               |                      |                                       | 210.9                       | H <sup>79</sup> Br                                     |
|                               |                      |                                       | 208.9                       | H <sup>81</sup> Br                                     |
| R2 (322.8)                    | 9.84                 | 18                                    | 290.8                       | CH <sub>4</sub> O                                      |
|                               |                      |                                       | 264.0                       | •C <sub>3</sub> H <sub>7</sub> O                       |
|                               |                      |                                       | 242.9                       | H <sup>79</sup> Br                                     |
|                               |                      |                                       | 240.8                       | H <sup>81</sup> Br                                     |
|                               |                      |                                       | 232.9                       | [•C <sub>3</sub> H <sub>7</sub> O, •OCH <sub>3</sub> ] |
| R3 (328.7)                    | 11.03                | 32                                    | 313.3                       | CH <sub>4</sub>                                        |
|                               |                      |                                       | 312.3                       | •OH                                                    |
|                               |                      |                                       | 248.9                       | H <sup>79</sup> Br                                     |
|                               |                      |                                       | 247.0                       | H <sup>81</sup> Br                                     |
| R4 (462.7)                    | 10.77                | 26                                    | 447.7                       | •CH <sub>3</sub>                                       |
|                               |                      |                                       | 382.9                       | H <sup>79</sup> Br                                     |
|                               |                      |                                       | 380.9                       | H <sup>81</sup> Br                                     |

|             |       |    |  |       |                                                                                         |
|-------------|-------|----|--|-------|-----------------------------------------------------------------------------------------|
|             |       |    |  | 367.9 | [H <sup>79</sup> Br, •CH <sub>3</sub> ]                                                 |
|             |       |    |  | 365.9 | [H <sup>81</sup> Br, •CH <sub>3</sub> ]                                                 |
|             |       |    |  | 777.4 | •CH <sub>3</sub>                                                                        |
|             |       |    |  | 713.5 | • <sup>79</sup> Br                                                                      |
|             |       |    |  | 712.6 | H <sup>79</sup> Br                                                                      |
|             |       |    |  | 711.5 | • <sup>81</sup> Br                                                                      |
| R5 (792.4)  | 22.19 | 22 |  | 710.6 | H <sup>81</sup> Br                                                                      |
|             |       |    |  | 697.5 | [H <sup>79</sup> Br, •CH <sub>3</sub> ]                                                 |
|             |       |    |  | 695.5 | [H <sup>81</sup> Br, •CH <sub>3</sub> ]                                                 |
|             |       |    |  | 541.6 | •C <sub>6</sub> H <sub>3</sub> O <sup>79</sup> Br <sup>81</sup> Br                      |
|             |       |    |  | 526.6 | [•C <sub>6</sub> H <sub>3</sub> O <sup>79</sup> Br <sup>81</sup> Br, •CH <sub>3</sub> ] |
|             |       |    |  | 846.6 | H <sup>79</sup> Br                                                                      |
|             |       |    |  | 844.6 | H <sup>81</sup> Br                                                                      |
| R6 (926.5)  | 5.55  | 20 |  | 676.7 | C <sub>6</sub> H <sub>4</sub> O <sup>79</sup> Br <sub>2</sub>                           |
|             |       |    |  | 674.7 | C <sub>6</sub> H <sub>4</sub> O <sup>79</sup> Br <sup>81</sup> Br                       |
|             |       |    |  | 672.7 | C <sub>6</sub> H <sub>4</sub> O <sup>81</sup> Br <sub>2</sub>                           |
|             |       |    |  | 986.4 | H <sub>2</sub> O                                                                        |
| R7 (1004.4) | 17.96 | 18 |  | 974.4 | [•CH <sub>3</sub> , •CH <sub>3</sub> ]                                                  |
|             |       |    |  | 924.4 | H <sup>79</sup> Br                                                                      |
|             |       |    |  | 922.4 | H <sup>81</sup> Br                                                                      |
|             |       |    |  | 306.2 | •CH <sub>3</sub>                                                                        |
| N1 (320.8)  | 4.27  | 25 |  | 303.0 | H <sub>2</sub> O                                                                        |
|             |       |    |  | 291.0 | CH <sub>2</sub> O                                                                       |

|            |       |    |       |                                                  |
|------------|-------|----|-------|--------------------------------------------------|
|            |       |    | 277.8 | $\bullet\text{C}_2\text{H}_3\text{O}$            |
|            |       |    | 250.8 | $\bullet\text{C}_3\text{H}_2\text{O}_2\bullet$   |
|            |       |    | 240.9 | $\text{H}^{79}\text{Br}$                         |
|            |       |    | 238.9 | $\text{H}^{81}\text{Br}$                         |
|            |       |    | 354.1 | $\bullet\text{CH}_3$                             |
|            |       |    | 351.2 | $\text{H}_2\text{O}$                             |
|            |       |    | 341.1 | $\text{C}_2\text{H}_4$                           |
|            |       |    | 336.8 | $\text{CH}_4\text{O}$                            |
| N2 (368.8) | 14.29 | 25 | 328.9 | $\text{C}_3\text{H}_4$                           |
|            |       |    | 325.1 | $\text{CH}_2=\text{CH-OH}$                       |
|            |       |    | 315.0 | $[\bullet\text{CHO}, \bullet\text{C}_2\text{H}]$ |
|            |       |    | 288.9 | $\text{H}^{79}\text{Br}$                         |
|            |       |    | 286.9 | $\text{H}^{81}\text{Br}$                         |
|            |       |    | 774.5 | $\text{NaOH}$                                    |
|            |       |    | 760.8 | $\text{CH}_3\text{ONa}$                          |
| N3 (814.5) | 21.84 | 18 | 712.5 | $\text{Na}^{79}\text{Br}$                        |
|            |       |    | 710.5 | $\text{Na}^{81}\text{Br}$                        |
|            |       |    | 697.5 | $[\text{Na}^{79}\text{Br}, \bullet\text{CH}_3]$  |
|            |       |    | 695.5 | $[\text{Na}^{81}\text{Br}, \bullet\text{CH}_3]$  |
|            |       |    | 829.5 | $\bullet\text{CH}_3$                             |
| N4 (844.6) | 5.24  | 32 | 812.5 | $\text{CH}_4\text{O}$                            |
|            |       |    | 764.6 | $\text{H}^{79}\text{Br}$                         |
|            |       |    | 762.6 | $\text{H}^{81}\text{Br}$                         |

|             |       |    |        |                                                                                                                   |
|-------------|-------|----|--------|-------------------------------------------------------------------------------------------------------------------|
|             |       |    | 749.6  | [H <sup>79</sup> Br, •CH <sub>3</sub> ]                                                                           |
|             |       |    | 747.6  | [H <sup>81</sup> Br, •CH <sub>3</sub> ]                                                                           |
|             |       |    | 734.6  | [H <sup>79</sup> Br, •CH <sub>3</sub> , •CH <sub>3</sub> ]                                                        |
|             |       |    | 732.5  | [H <sup>81</sup> Br, •CH <sub>3</sub> , •CH <sub>3</sub> ]                                                        |
|             |       |    | 844.6  | H <sup>79</sup> Br                                                                                                |
|             |       |    | 842.5  | H <sup>81</sup> Br                                                                                                |
|             |       |    | 831.3  | [•CH <sub>2</sub> <sup>79</sup> Br]                                                                               |
| N5 (461.8)  | 18.07 | 22 | 830.6  | CH <sub>3</sub> <sup>79</sup> Br                                                                                  |
|             |       |    | 829.5  | [•CH <sub>2</sub> <sup>81</sup> Br] / [H <sup>79</sup> Br, •CH <sub>3</sub> ]                                     |
|             |       |    | 828.5  | CH <sub>3</sub> <sup>81</sup> Br                                                                                  |
|             |       |    | 827.5  | [H <sup>81</sup> Br, •CH <sub>3</sub> ]                                                                           |
|             |       |    | 1096.3 | H <sup>79</sup> Br                                                                                                |
|             |       |    | 1094.3 | H <sup>81</sup> Br                                                                                                |
| N6 (1176.3) | 22.23 | 19 | 910.6  | C <sub>6</sub> H <sub>4</sub> O <sub>2</sub> <sup>79</sup> Br <sub>2</sub>                                        |
|             |       |    | 908.4  | C <sub>6</sub> H <sub>4</sub> O <sub>2</sub> <sup>79</sup> Br <sup>81</sup> Br                                    |
|             |       |    | 906.5  | C <sub>6</sub> H <sub>4</sub> O <sub>2</sub> <sup>81</sup> Br <sub>2</sub>                                        |
|             |       |    | 1175.2 | • <sup>79</sup> Br                                                                                                |
|             |       |    | 1174.2 | H <sup>79</sup> Br                                                                                                |
|             |       |    | 1173.3 | • <sup>81</sup> Br                                                                                                |
| N7 (626.7)  | 26.01 | 18 | 1172.3 | H <sup>81</sup> Br                                                                                                |
|             |       |    | 1093.3 | [H <sup>79</sup> Br, •CH <sub>3</sub> , •CH <sub>3</sub> , •CH <sub>3</sub> , H <sub>2</sub> O, H <sub>2</sub> O] |
|             |       |    | 1091.3 | [H <sup>81</sup> Br, •CH <sub>3</sub> , •CH <sub>3</sub> , •CH <sub>3</sub> , H <sub>2</sub> O, H <sub>2</sub> O] |

<sup>a</sup> CID means collision induced dissociation.

**Table S3.** The gradient elution conditions of HPLC-Orbitrap HRMS.

| Time (min) | MeOH (%) | Ultrapure water (%) |
|------------|----------|---------------------|
| 0          | 90       | 10                  |
| 8          | 90       | 10                  |
| 11         | 100      | 0                   |
| 23         | 100      | 0                   |
| 26         | 90       | 10                  |
| 37         | 90       | 10                  |

**Table S4.** The MS/MS conditions and fragmentation paths of TBBPA byproducts (**R1-R7** and **N1-N7**) in industrial-grade TBBPA chemicals detected by HPLC-Orbitrap HRMS.

| Precursor ions<br>( <i>m/z</i> ) | Retention time<br>(min) | Collision type   | Collision energy<br>(%) | Collision time<br>(ms) | Product ions<br>( <i>m/z</i> ) | Lost fragments                                                                          |
|----------------------------------|-------------------------|------------------|-------------------------|------------------------|--------------------------------|-----------------------------------------------------------------------------------------|
| R1 (290.88)                      | 9.56                    | HCD <sup>a</sup> | 90                      | 40                     | 80.9169                        |                                                                                         |
|                                  |                         |                  |                         |                        | 78.9189                        |                                                                                         |
| R2 (322.91)                      | 9.56                    | CID              | 25                      | 25                     | 290.8837                       | CH <sub>4</sub> O                                                                       |
| R3 (328.76)                      | 11.49                   | HCD              | 120                     | 40                     | 80.9168                        |                                                                                         |
|                                  |                         |                  |                         |                        | 78.9189                        |                                                                                         |
| R4 (462.84)                      | 10.52                   | CID              | 55                      | 60                     | 447.8119                       | •CH <sub>3</sub>                                                                        |
|                                  |                         |                  |                         |                        | 382.9095                       | H <sup>79</sup> Br                                                                      |
|                                  |                         |                  |                         |                        | 380.9116                       | H <sup>81</sup> Br                                                                      |
|                                  |                         |                  |                         |                        | 367.8861                       | [H <sup>79</sup> Br, •CH <sub>3</sub> ]                                                 |
|                                  |                         |                  |                         |                        | 365.8881                       | [H <sup>81</sup> Br, •CH <sub>3</sub> ]                                                 |
| R5 (792.59)                      | 19.37                   | CID              | 52                      | 40                     | 713.6690                       | • <sup>79</sup> Br                                                                      |
|                                  |                         |                  |                         |                        | 712.6615                       | H <sup>79</sup> Br                                                                      |
|                                  |                         |                  |                         |                        | 711.6713                       | • <sup>81</sup> Br                                                                      |
|                                  |                         |                  |                         |                        | 710.6633                       | H <sup>81</sup> Br                                                                      |
|                                  |                         |                  |                         |                        | 541.7356                       | •C <sub>6</sub> H <sub>3</sub> O <sup>79</sup> Br <sup>81</sup> Br                      |
|                                  |                         |                  |                         |                        | 526.7484                       | [•C <sub>6</sub> H <sub>3</sub> O <sup>79</sup> Br <sup>81</sup> Br, •CH <sub>3</sub> ] |
| R6 (926.66)                      | 6.05                    | CID              | 36                      | 25                     | 846.7329                       | H <sup>79</sup> Br                                                                      |
|                                  |                         |                  |                         |                        | 844.7352                       | H <sup>81</sup> Br                                                                      |

|              |       |     |    |    |           |                                                                   |
|--------------|-------|-----|----|----|-----------|-------------------------------------------------------------------|
|              |       |     |    |    | 676.7976  | C <sub>6</sub> H <sub>4</sub> O <sup>79</sup> Br <sub>2</sub>     |
|              |       |     |    |    | 674.7997  | C <sub>6</sub> H <sub>4</sub> O <sup>79</sup> Br <sup>81</sup> Br |
|              |       |     |    |    | 672.8019  | C <sub>6</sub> H <sub>4</sub> O <sup>81</sup> Br <sub>2</sub>     |
| R7 (1004.57) | 17.83 | CID | 18 | 25 | 924.6434  | H <sup>79</sup> Br                                                |
|              |       |     |    |    | 922.6646  | H <sup>81</sup> Br                                                |
| N1 (320.86)  | 3.92  | CID | 48 | 30 | 250.8522  | •C <sub>3</sub> H <sub>2</sub> O <sub>2</sub> •                   |
| N2 (368.79)  | 14.73 | CID | 42 | 30 | 288.8681  | H <sup>79</sup> Br                                                |
|              |       |     |    |    | 286.8702  | H <sup>81</sup> Br                                                |
| N3 (814.57)  | 19.41 | CID | 50 | 30 | 712.6613  | Na <sup>79</sup> Br                                               |
|              |       |     |    |    | 710.6633  | Na <sup>81</sup> Br                                               |
|              |       |     |    |    | 697.6382  | [Na <sup>79</sup> Br, •CH <sub>3</sub> ]                          |
|              |       |     |    |    | 695.6395  | [Na <sup>81</sup> Br, •CH <sub>3</sub> ]                          |
| N4 (844.74)  | 5.37  | CID | 68 | 65 | 829.7116  | •CH <sub>3</sub>                                                  |
|              |       |     |    |    | 764.8095  | H <sup>79</sup> Br                                                |
|              |       |     |    |    | 762.8116  | H <sup>81</sup> Br                                                |
|              |       |     |    |    | 749.7862  | [H <sup>79</sup> Br, •CH <sub>3</sub> ]                           |
|              |       |     |    |    | 747.7887  | [H <sup>81</sup> Br, •CH <sub>3</sub> ]                           |
|              |       |     |    |    | 734.7628  | [H <sup>79</sup> Br, •CH <sub>3</sub> , •CH <sub>3</sub> ]        |
|              |       |     |    |    | 732.7649  | [H <sup>81</sup> Br, •CH <sub>3</sub> , •CH <sub>3</sub> ]        |
| N5 (924.65)  | 17.78 | HCD | 70 | 40 | 80.9168   |                                                                   |
|              |       |     |    |    | 78.9189   |                                                                   |
| N6 (1176.51) | 19.24 | CID | 20 | 30 | 1096.5764 | H <sup>79</sup> Br                                                |
|              |       |     |    |    | 1094.5779 | H <sup>81</sup> Br                                                |



|              |       |     |    |    |           |                           |
|--------------|-------|-----|----|----|-----------|---------------------------|
|              |       |     |    |    | 908.6478  | $C_6H_4O_2^{79}Br^{81}Br$ |
| N7 (1254.42) | 21.81 | CID | 33 | 30 | 1174.4859 | $H^{79}Br$                |
|              |       |     |    |    | 1172.4876 | $H^{81}Br$                |

<sup>a</sup> HCD means high energy collision dissociation.

**Table S5.** The analytical performance of TriBP and TriBBPA in environmental samples detected by HPLC-Orbitrap HRMS.

| Compound | Recovery (%) |      |          | LOD <sup>a</sup>            |                              |                                  | ME <sup>b</sup> (%) |      |          |
|----------|--------------|------|----------|-----------------------------|------------------------------|----------------------------------|---------------------|------|----------|
|          | Water        | Soil | Sediment | Water (ng L <sup>-1</sup> ) | Soil (ng g <sup>-1</sup> dw) | Sediment (ng g <sup>-1</sup> dw) | Water               | Soil | Sediment |
| TriBP    | 100          | 91   | 94       | 0.59                        | 0.04                         | 0.04                             | 4                   | 6    | 7        |
| TriBBPA  | 102          | 105  | 96       | 0.68                        | 0.05                         | 0.05                             | 9                   | 4    | 5        |

<sup>a</sup> LOD means limit of detection.

<sup>b</sup> ME means matrix effect.

**Table S6.** Chemical information of TBBPA byproducts identified in industrial-grade TBBPA chemicals.

| Byproduct | Name [abbreviation]                                                      | Structure | Formula                                                        | SMILES                                                                                           |
|-----------|--------------------------------------------------------------------------|-----------|----------------------------------------------------------------|--------------------------------------------------------------------------------------------------|
| R1        | 4-ethenyl-2,6-dibromoanisole                                             |           | C <sub>9</sub> H <sub>8</sub> OBr <sub>2</sub>                 | BrC1=CC(C=C)=CC(Br)=C1OC                                                                         |
| R2        | 4-(2-hydroxyisopropyl)-2,6-dibromoanisole                                |           | C <sub>10</sub> H <sub>12</sub> O <sub>2</sub> Br <sub>2</sub> | CC(C)(O)C1=CC(Br)=C(OC)C(Br)=C1                                                                  |
| R3        | 2,4,6-tribromophenol<br>[TriBP]                                          |           | C <sub>6</sub> H <sub>3</sub> OBr <sub>3</sub>                 | BrC1=CC(Br)=CC(Br)=C1O                                                                           |
| R4        | Tribromobisphenol A<br>[TriBBPA]                                         |           | C <sub>15</sub> H <sub>13</sub> O <sub>2</sub> Br <sub>3</sub> | BrC1=CC(C(C)(C)C2=CC=C(O)C(Br)=C2)=CC(Br)=C1O                                                    |
| R5        | TBBPA mono(3,5-dibromophenol ether)                                      |           | C <sub>21</sub> H <sub>14</sub> O <sub>3</sub> Br <sub>6</sub> | BrC1=CC(C(C)(C2=CC(Br)=C(OC3=CC(Br)=C(O)C(Br)=C3)C(Br)=C2)C)=CC(Br)=C1O                          |
| R6        | 2,2'-dihydroxy-3,3'-dibromo-5,5'-di(3,5-dibromo-4-hydroxycumyl)-biphenyl |           | C <sub>30</sub> H <sub>24</sub> O <sub>4</sub> Br <sub>6</sub> | BrC1=CC(C(C)(C)C2=CC(Br)=C(O)C(C3=C(O)C(Br)=CC(C(C)(C)C4=CC(Br)=C(O)C(Br)=C4)=C3)=C2)=CC(Br)=C1O |

|    |                                                                                                          |                                                                                      |                         |                                                                                                                                       |
|----|----------------------------------------------------------------------------------------------------------|--------------------------------------------------------------------------------------|-------------------------|---------------------------------------------------------------------------------------------------------------------------------------|
| R7 | TBBPA mono(TriBBPA ether)                                                                                | 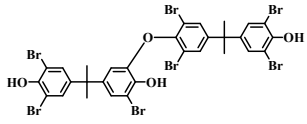   | $C_{30}H_{23}O_4Br_7$   | <chem>BrC1=CC(C(C)(C2=CC(Br)=C(O)C(Br)=C2)C)=CC(Br)=C1OC3=CC(C(C)(C)C4=CC(Br)=C(O)C(Br)=C4)=CC(Br)=C3O</chem>                         |
| N1 | 1-(3,5-dibromo-4-hydroxyphenyl)propane-1,2-dione                                                         |    | $C_9H_6O_3Br_2$         | <chem>OC1=C(Br)C=C(C(C(C)=O)=O)C=C1Br</chem>                                                                                          |
| N2 | 2,4,6-tribromo-1-(3-(1-hydroxy-2-propenyl))-benzene                                                      |    | $C_9H_7OBr_3$           | <chem>BrC1=CC(Br)=CC(Br)=C1/C=C/CO</chem>                                                                                             |
| N3 | TBBPA mono(sodium 3,5-dibromophenolate ether)                                                            |    | $C_{21}H_{13}O_3Br_6Na$ | <chem>BrC1=CC(C(C)(C2=CC(Br)=C(OC3=CC(Br)=C(O[Na])C(Br)=C3)C(Br)=C2)C)=CC(Br)=C1O</chem>                                              |
| N4 | 1-bromo-3,8-di(3,5-dibromo-4-hydroxycumyl)-dibenzo[b,e][1,4]dioxine                                      |    | $C_{30}H_{23}O_4Br_5$   | <chem>BrC1=CC(C(C)(C)C2=CC=C(OC3=C(O4)C(Br)=CC(C(C)(C)C5=CC(Br)=C(O)C(Br)=C5)=C3)C4=C2)=CC(Br)=C1O</chem>                             |
| N5 | 1,6-dibromo-3,8-di(3,5-dibromo-4-hydroxycumyl)-dibenzo[b,e][1,4]dioxine                                  |  | $C_{30}H_{22}O_4Br_6$   | <chem>BrC1=CC(C(C)(C)C2=CC(Br)=C(OC3=C(O4)C(Br)=CC(C(C)(C)C5=CC(Br)=C(O)C(Br)=C5)=C3)C4=C2)=CC(Br)=C1O</chem>                         |
| N6 | [2,2'-dihydroxy-3,3'-dibromo-5,5'-di(3,5-dibromo-4-hydroxycumyl)-biphenyl] mono(3,5-dibromophenol ether) |  | $C_{36}H_{26}O_5Br_8$   | <chem>BrC1=CC(C(C)(C)C2=CC(Br)=C(O)C(C3=C(O)C(Br)=CC(C(C)(C)C4=CC(Br)=C(O)C5=C(C(Br)=C(O)C(Br)=C5)C(Br)=C4)=C3)=C2)=CC(Br)=C1O</chem> |

---

N7

2,6-dibromo-4-(2-(3-bromo-5-(TBBPA  
mono(3,5-dibromophenol ether))-4-  
hydroxyphenyl)isopropyl)phenol

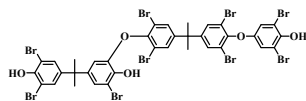

$C_{36}H_{25}O_5Br_9$

BrC1=CC(C(C)(C2=CC(Br)=C(OC3=CC(Br)  
=C(O)C(Br)=C3)C(Br)=C2)C)=CC(Br)=C1O  
C4=CC(C(C)(C)C5=CC(Br)=C(O)C(Br)=C5)  
=CC(Br)=C4O

---

**Table S7.** Single-point energies of possible structures of R7.

| Compound | Structure | Single-point energy (a.u.) |
|----------|-----------|----------------------------|
| R7-1     |           | -19458.5611                |
| R7-2     |           | -19458.4906                |
| R7-3     |           | -19458.4917                |

**Table S8.** The results of TBBPA byproducts analyzed by HPLC-Orbitrap HRMS.

| Byproduct | Detected <i>m/z</i> | Theoretical <i>m/z</i> | Formula                                                                          | Error (ppm) | Isotope ratio               |
|-----------|---------------------|------------------------|----------------------------------------------------------------------------------|-------------|-----------------------------|
| R1        | 290.8840            | 290.8849               | [C <sub>9</sub> H <sub>7</sub> OBr <sub>2</sub> ] <sup>-</sup>                   | -2.980      | 1:2:1                       |
| R2        | 322.9102            | 322.9111               | [C <sub>10</sub> H <sub>11</sub> O <sub>2</sub> Br <sub>2</sub> ] <sup>-</sup>   | -2.637      | 1:2:1                       |
| R3        | 328.7632            | 328.7641               | [C <sub>6</sub> H <sub>2</sub> OBr <sub>3</sub> ] <sup>-</sup>                   | -2.583      | 1:3:3:1                     |
| R4        | 462.8361            | 462.8372               | [C <sub>15</sub> H <sub>12</sub> O <sub>2</sub> Br <sub>3</sub> ] <sup>-</sup>   | -2.407      | 1:3:3:1                     |
| R5        | 792.5892            | 792.5909               | [C <sub>21</sub> H <sub>13</sub> O <sub>3</sub> Br <sub>6</sub> ] <sup>-</sup>   | -2.111      | 1:6:15:20:15:6:1            |
| R6        | 926.6613            | 926.6641               | [C <sub>30</sub> H <sub>23</sub> O <sub>4</sub> Br <sub>6</sub> ] <sup>-</sup>   | -2.977      | 1:6:15:20:15:6:1            |
| R7        | 1004.5721           | 1004.5746              | [C <sub>30</sub> H <sub>22</sub> O <sub>4</sub> Br <sub>7</sub> ] <sup>-</sup>   | -2.509      | 1:7:21:35:35:21:7:1         |
| N1        | 320.8582            | 320.8591               | [C <sub>9</sub> H <sub>5</sub> O <sub>3</sub> Br <sub>2</sub> ] <sup>-</sup>     | -2.543      | 1:2:1                       |
| N2        | 368.7944            | 368.7954               | [C <sub>9</sub> H <sub>6</sub> OBr <sub>3</sub> ] <sup>-</sup>                   | -2.656      | 1:3:3:1                     |
| N3        | 814.5711            | 814.5729               | [C <sub>21</sub> H <sub>12</sub> O <sub>3</sub> Br <sub>6</sub> Na] <sup>-</sup> | -2.109      | 1:6:15:20:15:6:1            |
| N4        | 844.7375            | 844.7400               | [C <sub>30</sub> H <sub>22</sub> O <sub>4</sub> Br <sub>5</sub> ] <sup>-</sup>   | -2.962      | 1:5:10:10:5:1               |
| N5        | 924.6456            | 924.6484               | [C <sub>30</sub> H <sub>21</sub> O <sub>4</sub> Br <sub>6</sub> ] <sup>-</sup>   | -3.015      | 1:6:15:20:15:6:1            |
| N6        | 1176.5057           | 1176.5093              | [C <sub>36</sub> H <sub>25</sub> O <sub>5</sub> Br <sub>8</sub> ] <sup>-</sup>   | -3.027      | 1:8:28:56:70:56:28:8:1      |
| N7        | 1254.4156           | 1254.4198              | [C <sub>36</sub> H <sub>24</sub> O <sub>5</sub> Br <sub>9</sub> ] <sup>-</sup>   | -3.328      | 1:9:36:84:126:126:84:36:9:1 |

**Table S9.** Quantitative and semi-quantitative concentrations ( $\mu\text{g g}^{-1}$ ) of byproducts in industrial-grade TBBPA chemicals.<sup>a</sup>

| Byproduct                | Pulov              | Duoju              | Goldchem           | Reform             | Yincheng           | DF <sup>b</sup> (%) |
|--------------------------|--------------------|--------------------|--------------------|--------------------|--------------------|---------------------|
| R1 ( <i>m/z</i> 290.88)  | $6.79 \times 10^2$ | $7.57 \times 10^2$ | $8.35 \times 10^2$ | $1.14 \times 10^3$ | $1.15 \times 10^3$ | 100                 |
| R2 ( <i>m/z</i> 322.91)  | $8.01 \times 10^3$ | $8.77 \times 10^3$ | $9.95 \times 10^3$ | $1.04 \times 10^4$ | $1.35 \times 10^4$ | 100                 |
| R3 ( <i>m/z</i> 328.76)  | $3.55 \times 10^3$ | $5.13 \times 10^3$ | $3.87 \times 10^3$ | $3.89 \times 10^3$ | $1.91 \times 10^3$ | 100                 |
| R4 ( <i>m/z</i> 462.84)  | $1.37 \times 10^4$ | $1.68 \times 10^4$ | $1.55 \times 10^4$ | $2.29 \times 10^4$ | $2.01 \times 10^4$ | 100                 |
| R5 ( <i>m/z</i> 792.59)  | 90.2               | $1.26 \times 10^2$ | $1.41 \times 10^2$ | $2.30 \times 10^2$ | $2.00 \times 10^2$ | 100                 |
| R6 ( <i>m/z</i> 926.66)  | $4.77 \times 10^2$ | <LOD <sup>c</sup>  | 67.1               | $1.99 \times 10^3$ | $1.93 \times 10^3$ | 80                  |
| R7 ( <i>m/z</i> 1004.57) | 14.8               | 13.5               | <LOD               | 20.8               | 24.6               | 80                  |
| N1 ( <i>m/z</i> 320.86)  | $6.64 \times 10^2$ | $9.89 \times 10^2$ | $6.12 \times 10^2$ | <LOD               | <LOD               | 60                  |
| N2 ( <i>m/z</i> 368.79)  | <LOD               | <LOD               | <LOD               | <LOD               | $1.40 \times 10^2$ | 20                  |
| N3 ( <i>m/z</i> 814.57)  | 11.6               | 18.0               | 17.4               | 43.7               | 27.5               | 100                 |
| N4 ( <i>m/z</i> 844.74)  | <LOD               | <LOD               | <LOD               | 10.8               | 9.20               | 40                  |
| N5 ( <i>m/z</i> 924.65)  | <LOD               | <LOD               | <LOD               | 33.1               | 38.3               | 40                  |
| N6 ( <i>m/z</i> 1176.51) | <LOD               | <LOD               | <LOD               | 15.9               | 10.9               | 40                  |
| N7 ( <i>m/z</i> 1254.42) | <LOD               | 2.77               | <LOD               | 3.62               | 3.94               | 60                  |

<sup>a</sup> Byproducts R3 and R4 were quantified by using their standard solution, and other TBBPA byproducts were semi-quantitatively analyzed by comparing with the TriBBPA standard solution.

<sup>b</sup> DF means detection frequency.

<sup>c</sup> <LOD means below the limit of detection.



**Table S10.** Concentrations of TBBPA byproducts in river water (ng L<sup>-1</sup>), soil (ng g<sup>-1</sup> dw), and sediment (ng g<sup>-1</sup> dw).

|          | R1   | R2                   | R3                   | R4   | R5                | R6   | R7   | N1   | N2   | N3   | N4   | N5   | N6   | N7   |
|----------|------|----------------------|----------------------|------|-------------------|------|------|------|------|------|------|------|------|------|
| Water-1  | 52.5 | 28.2                 | 2.27×10 <sup>2</sup> | 7.90 | <LOD <sup>a</sup> | <LOD |
| Water-2  | 13.4 | 4.53                 | 36.9                 | 2.33 | <LOD              | <LOD | <LOD | <LOD | <LOD | <LOD | <LOD | <LOD | <LOD | <LOD |
| Water-3  | 32.0 | 14.1                 | 94.9                 | 9.96 | <LOD              | <LOD | <LOD | <LOD | <LOD | <LOD | <LOD | <LOD | <LOD | <LOD |
| Water-4  | 27.5 | 4.42                 | 1.13×10 <sup>2</sup> | 6.00 | <LOD              | <LOD | <LOD | <LOD | <LOD | <LOD | <LOD | <LOD | <LOD | <LOD |
| Water-5  | 17.1 | 2.05                 | 1.20×10 <sup>2</sup> | 7.38 | <LOD              | <LOD | <LOD | <LOD | <LOD | <LOD | <LOD | <LOD | <LOD | <LOD |
| Water-6  | 22.3 | 24.1                 | 1.44×10 <sup>2</sup> | 14.6 | <LOD              | <LOD | <LOD | <LOD | <LOD | <LOD | <LOD | <LOD | <LOD | <LOD |
| Water-7  | 27.6 | 20.4                 | 1.52×10 <sup>2</sup> | 10.8 | <LOD              | <LOD | <LOD | <LOD | <LOD | <LOD | <LOD | <LOD | <LOD | <LOD |
| Water-8  | 23.7 | 33.9                 | 1.11×10 <sup>2</sup> | 12.5 | <LOD              | <LOD | <LOD | <LOD | <LOD | <LOD | <LOD | <LOD | <LOD | <LOD |
| Water-9  | 45.0 | 75.1                 | 2.10×10 <sup>2</sup> | 19.5 | <LOD              | <LOD | <LOD | <LOD | <LOD | <LOD | <LOD | <LOD | <LOD | <LOD |
| Water-10 | 49.0 | 1.39×10 <sup>2</sup> | 4.57×10 <sup>2</sup> | 31.1 | <LOD              | <LOD | <LOD | <LOD | <LOD | <LOD | <LOD | <LOD | <LOD | <LOD |
| Water-11 | 58.2 | 2.22×10 <sup>2</sup> | 4.08×10 <sup>2</sup> | 25.1 | <LOD              | <LOD | <LOD | <LOD | <LOD | <LOD | <LOD | <LOD | <LOD | <LOD |
| Water-12 | 20.1 | 39.7                 | 1.13×10 <sup>2</sup> | 1.73 | <LOD              | <LOD | <LOD | <LOD | <LOD | <LOD | <LOD | <LOD | <LOD | <LOD |
| Water-13 | 2.24 | 2.84                 | 44.5                 | <LOD | <LOD              | <LOD | <LOD | <LOD | <LOD | <LOD | <LOD | <LOD | <LOD | <LOD |
| Water-14 | <LOD | <LOD                 | 8.65                 | <LOD | <LOD              | <LOD | <LOD | <LOD | <LOD | <LOD | <LOD | <LOD | <LOD | <LOD |
| Water-15 | <LOD | <LOD                 | 1.87                 | <LOD | <LOD              | <LOD | <LOD | <LOD | <LOD | <LOD | <LOD | <LOD | <LOD | <LOD |
| Water-16 | <LOD | <LOD                 | 12.1                 | <LOD | <LOD              | <LOD | <LOD | <LOD | <LOD | <LOD | <LOD | <LOD | <LOD | <LOD |

|          | R1   | R2   | R3   | R4   | R5   | R6   | R7   | N1   | N2   | N3   | N4   | N5   | N6   | N7   |
|----------|------|------|------|------|------|------|------|------|------|------|------|------|------|------|
| Water-17 | <LOD | <LOD | 8.61 | <LOD |
| Water-18 | 0.84 | <LOD | 1.10 | <LOD |
| Water-19 | <LOD | <LOD | 47.1 | <LOD |
| Water-20 | <LOD | <LOD | 11.8 | <LOD |
| Water-21 | <LOD | <LOD | 11.6 | <LOD |
| Water-22 | <LOD | <LOD | 6.76 | <LOD |
| Water-23 | <LOD | <LOD | 7.45 | <LOD |
| Water-24 | <LOD | <LOD | 3.39 | <LOD |
| Water-25 | <LOD | <LOD | 4.96 | <LOD |
| Water-26 | <LOD | <LOD | 17.2 | <LOD |
| Water-27 | <LOD | <LOD | 10.0 | <LOD |
| Water-28 | <LOD | <LOD | 12.5 | <LOD |
| Water-29 | <LOD | <LOD | 5.36 | <LOD |
| Water-30 | <LOD | <LOD | 9.32 | <LOD |
| Water-31 | <LOD | <LOD | 8.54 | <LOD |
| Water-32 | <LOD | <LOD | 3.37 | <LOD |
| Water-33 | <LOD | <LOD | 3.72 | <LOD |
| Soil-1   | <LOD | <LOD | 3.52 | 0.49 | <LOD |

|         | R1   | R2   | R3   | R4   | R5   | R6   | R7   | N1   | N2   | N3   | N4   | N5   | N6   | N7   |
|---------|------|------|------|------|------|------|------|------|------|------|------|------|------|------|
| Soil-2  | <LOD | 0.08 | 0.46 | <LOD |
| Soil-3  | <LOD | 0.08 | 14.2 | 1.57 | <LOD | <LOD | <LOD | 0.08 | <LOD | <LOD | <LOD | <LOD | <LOD | <LOD |
| Soil-4  | <LOD | 0.19 | 10.8 | 5.40 | <LOD | <LOD | <LOD | 0.23 | <LOD | <LOD | <LOD | <LOD | <LOD | <LOD |
| Soil-5  | 0.06 | <LOD | 4.25 | 1.92 | <LOD | <LOD | <LOD | 0.06 | <LOD | <LOD | <LOD | <LOD | <LOD | <LOD |
| Soil-6  | 0.09 | 0.80 | 27.6 | 6.52 | <LOD | <LOD | <LOD | 0.14 | <LOD | <LOD | <LOD | <LOD | <LOD | <LOD |
| Soil-7  | <LOD | <LOD | 6.66 | 0.12 | <LOD |
| Soil-8  | <LOD | <LOD | 7.94 | 0.37 | <LOD |
| Soil-9  | 0.12 | <LOD | 9.72 | 0.40 | <LOD |
| Soil-10 | <LOD | <LOD | 7.07 | <LOD |
| Soil-11 | 0.15 | <LOD | 2.63 | <LOD |
| Soil-12 | <LOD | <LOD | 1.33 | <LOD |
| Soil-13 | <LOD | <LOD | 8.00 | 0.38 | <LOD |
| Soil-14 | <LOD | <LOD | 0.43 | <LOD |
| Soil-15 | <LOD | <LOD | 0.92 | <LOD |
| Soil-16 | <LOD | <LOD | 0.86 | <LOD |
| Soil-17 | <LOD | <LOD | 0.65 | <LOD |
| Soil-18 | <LOD | <LOD | 1.35 | <LOD |
| Soil-19 | <LOD | <LOD | 1.01 | <LOD |

|            | R1   | R2   | R3                   | R4   | R5   | R6   | R7   | N1   | N2   | N3   | N4   | N5   | N6   | N7   |
|------------|------|------|----------------------|------|------|------|------|------|------|------|------|------|------|------|
| Soil-21    | <LOD | <LOD | 0.77                 | <LOD |
| Soil-23    | <LOD | <LOD | 3.51                 | <LOD |
| Soil-24    | 0.12 | <LOD | 1.17                 | <LOD |
| Soil-25    | <LOD | <LOD | 0.78                 | <LOD |
| Soil-26    | <LOD | <LOD | 1.19                 | <LOD |
| Soil-28    | 0.13 | <LOD | 1.86                 | <LOD |
| Soil-29    | <LOD | <LOD | 0.59                 | <LOD |
| Soil-30    | <LOD | <LOD | 1.39                 | <LOD |
| Soil-31    | <LOD | <LOD | 1.00                 | 0.10 | <LOD |
| Sediment-5 | 0.70 | 0.07 | 1.56×10 <sup>2</sup> | 6.04 | <LOD | <LOD | <LOD | 0.60 | <LOD | <LOD | <LOD | <LOD | <LOD | <LOD |
| Sediment-7 | 2.85 | <LOD | 12.2                 | 2.11 | <LOD | <LOD | <LOD | 0.05 | <LOD | <LOD | <LOD | <LOD | <LOD | <LOD |
| Sediment-8 | 0.31 | 0.08 | 11.8                 | 2.53 | <LOD | <LOD | <LOD | 0.13 | <LOD | <LOD | <LOD | <LOD | <LOD | <LOD |

<sup>a</sup> <LOD means below the limit of detection.

**Table S11.** The prediction results of carcinogenicity (binary and trinary), eye corrosion, eye irritation, and acute oral toxicity.

| Byproduct | Carcinogenicity (binary) |             | Carcinogenicity (trinary) |             | Eye corrosion  |             | Eye irritation |             | Acute Oral Toxicity (-log mol/kg) |
|-----------|--------------------------|-------------|---------------------------|-------------|----------------|-------------|----------------|-------------|-----------------------------------|
|           | Value                    | Probability | Value                     | Probability | Value          | Probability | Value          | Probability |                                   |
| R1        | - <sup>a</sup>           | 0.5537      | Warning                   | 0.4345      | + <sup>b</sup> | 0.7742      | +              | 0.9654      | 1.733                             |
| R2        | -                        | 0.6450      | Non-required              | 0.5131      | -              | 0.6819      | +              | 0.9697      | 1.431                             |
| R3        | -                        | 0.5626      | Non-required              | 0.5232      | +              | 0.9873      | +              | 0.9950      | 1.674                             |
| R4        | -                        | 0.6187      | Non-required              | 0.5936      | -              | 0.9259      | +              | 0.9826      | 1.629                             |
| R5        | -                        | 0.6348      | Non-required              | 0.5021      | -              | 0.9684      | +              | 0.7511      | 1.605                             |
| R6        | -                        | 0.6258      | Non-required              | 0.4667      | -              | 0.9826      | -              | 0.6641      | 1.716                             |
| R7        | -                        | 0.7059      | Non-required              | 0.4336      | -              | 0.9847      | -              | 0.7168      | 1.699                             |
| N1        | -                        | 0.6458      | Non-required              | 0.4789      | +              | 0.8840      | +              | 0.9777      | 1.932                             |
| N2        | -                        | 0.5584      | Non-required              | 0.6591      | +              | 0.8403      | +              | 0.9934      | 0.908                             |
| N3        | -                        | 0.6209      | Non-required              | 0.4864      | -              | 0.9329      | +              | 0.5269      | 1.729                             |
| N4        | -                        | 0.8869      | Danger                    | 0.4341      | -              | 0.9858      | -              | 0.6355      | 1.714                             |
| N5        | -                        | 0.8869      | Danger                    | 0.4341      | -              | 0.9858      | -              | 0.6383      | 2.156                             |
| N6        | -                        | 0.6396      | Non-required              | 0.4040      | -              | 0.9868      | -              | 0.8475      | 1.820                             |
| N7        | -                        | 0.7059      | Non-required              | 0.4336      | -              | 0.9847      | -              | 0.8537      | 1.813                             |

**Table S12.** The prediction results of ames mutagenesis, hERG, micronuclear, hepatotoxicity, and skin sensitization.

| Compound | Ames mutagenesis |             | hERG <sup>c</sup> |             | Micronuclear |             | Hepatotoxicity |             | skin sensitisation |             |
|----------|------------------|-------------|-------------------|-------------|--------------|-------------|----------------|-------------|--------------------|-------------|
|          | Value            | Probability | Value             | Probability | Value        | Probability | Value          | Probability | Value              | Probability |
| R1       | -                | 0.8700      | -                 | 0.5493      | -            | 0.7610      | +              | 0.6625      | +                  | 0.6785      |
| R2       | -                | 0.8200      | -                 | 0.5588      | -            | 0.7999      | +              | 0.5284      | -                  | 0.5389      |
| R3       | -                | 0.9700      | -                 | 0.8167      | -            | 0.6651      | +              | 0.7875      | +                  | 0.9120      |
| R4       | -                | 0.9100      | -                 | 0.5450      | -            | 0.6700      | +              | 0.7750      | +                  | 0.7030      |
| R5       | -                | 0.8400      | +                 | 0.8154      | -            | 0.6400      | +              | 0.6000      | -                  | 0.5908      |
| R6       | -                | 0.8700      | +                 | 0.8852      | -            | 0.5800      | +              | 0.7500      | -                  | 0.7716      |
| R7       | -                | 0.8600      | +                 | 0.9024      | -            | 0.6300      | +              | 0.5625      | -                  | 0.7258      |
| N1       | -                | 0.8100      | -                 | 0.8404      | +            | 0.6664      | +              | 0.8875      | +                  | 0.7265      |
| N2       | -                | 0.7500      | -                 | 0.7534      | -            | 0.7533      | +              | 0.5928      | +                  | 0.8137      |
| N3       | -                | 0.7800      | +                 | 0.7189      | -            | 0.7226      | +              | 0.5875      | -                  | 0.6988      |
| N4       | -                | 0.7500      | +                 | 0.9087      | +            | 0.5900      | +              | 0.6000      | -                  | 0.8054      |
| N5       | -                | 0.8000      | +                 | 0.9205      | +            | 0.5900      | +              | 0.7000      | -                  | 0.8054      |
| N6       | -                | 0.7900      | +                 | 0.7878      | -            | 0.6100      | +              | 0.5125      | -                  | 0.8455      |
| N7       | -                | 0.7900      | +                 | 0.8769      | -            | 0.6300      | +              | 0.5375      | -                  | 0.7258      |

**Table S13.** The prediction results of respiratory, reproductive, mitochondrial, acute oral toxicity, and nephrotoxicity.

| Compound | Respiratory toxicity |             | Reproductive toxicity |             | Mitochondrial toxicity |             | Nephrotoxicity |             | Acute Oral Toxicity (c) |             |
|----------|----------------------|-------------|-----------------------|-------------|------------------------|-------------|----------------|-------------|-------------------------|-------------|
|          | Value                | Probability | Value                 | Probability | Value                  | Probability | Value          | Probability | Value                   | Probability |
| R1       | -                    | 0.7778      | +                     | 0.7333      | -                      | 0.9000      | -              | 0.8437      | III                     | 0.8566      |
| R2       | -                    | 0.7444      | -                     | 0.5778      | -                      | 0.8000      | -              | 0.7990      | III                     | 0.5939      |
| R3       | -                    | 0.7222      | +                     | 0.9392      | -                      | 0.8875      | -              | 0.8459      | III                     | 0.5271      |
| R4       | -                    | 0.6000      | -                     | 0.7889      | -                      | 0.7000      | -              | 0.7819      | IV                      | 0.5893      |
| R5       | -                    | 0.6667      | -                     | 0.6778      | -                      | 0.6875      | -              | 0.8370      | IV                      | 0.5053      |
| R6       | -                    | 0.6556      | -                     | 0.7444      | -                      | 0.6625      | -              | 0.8021      | IV                      | 0.5412      |
| R7       | -                    | 0.5333      | -                     | 0.6889      | -                      | 0.6750      | -              | 0.8201      | III                     | 0.5137      |
| N1       | -                    | 0.6556      | +                     | 0.6222      | -                      | 0.6250      | -              | 0.8112      | III                     | 0.8913      |
| N2       | -                    | 0.5889      | -                     | 0.5778      | -                      | 0.9000      | -              | 0.7918      | III                     | 0.8196      |
| N3       | -                    | 0.6667      | -                     | 0.6222      | -                      | 0.7000      | -              | 0.8688      | III                     | 0.5447      |
| N4       | -                    | 0.6667      | +                     | 0.6000      | -                      | 0.5750      | -              | 0.8436      | III                     | 0.5813      |
| N5       | -                    | 0.6333      | +                     | 0.6000      | -                      | 0.5750      | -              | 0.8771      | III                     | 0.5813      |
| N6       | -                    | 0.6333      | -                     | 0.7000      | -                      | 0.6750      | -              | 0.8073      | IV                      | 0.5206      |
| N7       | -                    | 0.5222      | -                     | 0.6889      | -                      | 0.6750      | -              | 0.7937      | III                     | 0.5137      |

**Table S14.** The prediction results of estrogen, androgen, thyroid, glucocorticoid receptor binding, and aromatase binding.

| Compound | Estrogen receptor binding |             | Androgen receptor binding |             | Thyroid receptor binding |             | Glucocorticoid receptor binding |             | Aromatase binding |             |
|----------|---------------------------|-------------|---------------------------|-------------|--------------------------|-------------|---------------------------------|-------------|-------------------|-------------|
|          | Value                     | Probability | Value                     | Probability | Value                    | Probability | Value                           | Probability | Value             | Probability |
| R1       | -                         | 0.6093      | -                         | 0.7967      | -                        | 0.6491      | -                               | 0.8413      | -                 | 0.8021      |
| R2       | +                         | 0.6298      | -                         | 0.8368      | -                        | 0.6062      | -                               | 0.6479      | -                 | 0.5979      |
| R3       | +                         | 0.5557      | -                         | 0.5535      | -                        | 0.5952      | -                               | 0.6566      | -                 | 0.7773      |
| R4       | +                         | 0.8564      | +                         | 0.7607      | +                        | 0.6684      | +                               | 0.8952      | +                 | 0.8899      |
| R5       | +                         | 0.8762      | +                         | 0.5792      | +                        | 0.7588      | +                               | 0.7491      | +                 | 0.7986      |
| R6       | +                         | 0.8708      | +                         | 0.7701      | +                        | 0.7472      | +                               | 0.7923      | +                 | 0.7796      |
| R7       | +                         | 0.7987      | +                         | 0.6177      | +                        | 0.6177      | +                               | 0.7547      | +                 | 0.6670      |
| N1       | -                         | 0.4916      | -                         | 0.6002      | -                        | 0.7184      | -                               | 0.5315      | -                 | 0.6802      |
| N2       | -                         | 0.5074      | -                         | 0.5535      | -                        | 0.5000      | -                               | 0.5095      | -                 | 0.6782      |
| N3       | +                         | 0.7818      | -                         | 0.5141      | +                        | 0.7327      | +                               | 0.7114      | +                 | 0.7771      |
| N4       | +                         | 0.8058      | +                         | 0.7077      | +                        | 0.6802      | +                               | 0.7718      | +                 | 0.6659      |
| N5       | +                         | 0.8002      | +                         | 0.6010      | +                        | 0.6669      | +                               | 0.7505      | +                 | 0.6555      |
| N6       | +                         | 0.7850      | +                         | 0.7037      | +                        | 0.6704      | +                               | 0.6882      | +                 | 0.7040      |
| N7       | +                         | 0.7917      | +                         | 0.5948      | +                        | 0.6486      | +                               | 0.6843      | +                 | 0.6518      |



**Table S15.** The prediction results of PPAR gamma, biodegradation, honey bee, crustacea aquatic, and fish aquatic toxicity.

| Compound | PPAR gamma |             | Honey bee toxicity |             | Biodegradation |             | Crustacea aquatic toxicity |             | Fish aquatic toxicity |             |
|----------|------------|-------------|--------------------|-------------|----------------|-------------|----------------------------|-------------|-----------------------|-------------|
|          | Value      | Probability | Value              | Probability | Value          | Probability | Value                      | Probability | Value                 | Probability |
| R1       | -          | 0.6244      | -                  | 0.8536      | -              | 0.7250      | +                          | 0.6000      | +                     | 0.9904      |
| R2       | -          | 0.5510      | -                  | 0.9676      | -              | 0.5500      | +                          | 0.7000      | +                     | 0.9491      |
| R3       | -          | 0.5000      | -                  | 0.9741      | +              | 0.7000      | +                          | 0.6500      | +                     | 0.9565      |
| R4       | +          | 0.8475      | -                  | 0.9758      | -              | 0.8250      | +                          | 0.7600      | +                     | 0.9940      |
| R5       | +          | 0.8764      | -                  | 0.9184      | -              | 0.8500      | +                          | 0.7000      | +                     | 0.9965      |
| R6       | +          | 0.8404      | -                  | 0.9664      | -              | 0.8750      | +                          | 0.6500      | +                     | 1.0000      |
| R7       | +          | 0.7110      | -                  | 0.9314      | -              | 0.9250      | +                          | 0.6851      | +                     | 0.9964      |
| N1       | -          | 0.7480      | -                  | 0.9790      | +              | 0.5750      | -                          | 0.7000      | +                     | 0.9748      |
| N2       | +          | 0.5777      | -                  | 0.9391      | -              | 0.6250      | -                          | 0.6200      | +                     | 0.9673      |
| N3       | +          | 0.8172      | -                  | 0.8446      | -              | 0.8750      | +                          | 0.7400      | +                     | 0.9969      |
| N4       | +          | 0.6987      | -                  | 0.9471      | -              | 0.9500      | +                          | 0.7000      | +                     | 0.9763      |
| N5       | +          | 0.6995      | -                  | 0.9497      | -              | 0.9250      | +                          | 0.6600      | +                     | 0.9763      |
| N6       | +          | 0.7194      | -                  | 0.8877      | -              | 0.8750      | +                          | 0.6600      | +                     | 1.0000      |
| N7       | +          | 0.7104      | -                  | 0.8881      | -              | 0.9250      | +                          | 0.6951      | +                     | 0.6951      |

<sup>a</sup> “-” means negative.

<sup>b</sup> “+” means positive.

<sup>c</sup> hERG means the ability to block the human Ether-a-go-go-Related Gene Salubrinal channel and its analogs.

**Table S16.** Calculated physical-chemical constants of TBBPA byproducts<sup>a</sup>.

| Byproduct | log $K_{ow}$ <sup>b</sup> | log $K_{oa}$ <sup>c</sup> | log $K_{oc}$ <sup>d</sup> | BCF <sup>e</sup> |
|-----------|---------------------------|---------------------------|---------------------------|------------------|
| R1        | 4.76                      | 7.74                      | 3.61                      | 638              |
| R2        | 3.81                      | 10.64                     | 2.68                      | 151              |
| R3        | 4.13                      | 9.97                      | 3.38                      | 247              |
| R4        | 6.31                      | 16.94                     | 4.75                      | 6800             |
| R5        | 10.20                     | 23.68                     | 6.96                      | 360              |
| R6        | 12.40                     | 34.11                     | 8.45                      | 30.2             |
| R7        | 13.22                     | 31.89                     | 8.79                      | 11.9             |
| N1        | 2.41                      | 12.99                     | 1.97                      | 18.1             |
| N2        | 4.51                      | 10.90                     | 3.01                      | 245              |
| N3        | 7.51                      | 20.74                     | 5.47                      | 7480             |
| N4        | 13.05                     | 27.94                     | 8.48                      | 14.4             |
| N5        | 13.94                     | 29.23                     | 8.97                      | 5.28             |
| N6        | 15.39                     | 39.56                     | 10.16                     | 3.16             |
| N7        | 16.22                     | 37.35                     | 10.51                     | 3.16             |

<sup>a</sup> Calculated by EPI Suite™ v4.11.

<sup>b</sup> octanol-water partition coefficient.

<sup>c</sup> octanol-air partition coefficient.

<sup>d</sup> soil absorption coefficient.

<sup>e</sup> bioconcentration factor (L/kg, wet-wt).

## References

1. A. F. Liu, G. B. Qu, C. L. Zhang, Y. Gao, J. B. Shi, Y. G. Du and G. B. Jiang, Identification of two novel brominated contaminants in water samples by ultra-high performance liquid chromatography-Orbitrap Fusion Tribrid mass spectrometer, *J. Chromatogr. A*, 2015, **1377**, 92-99.
2. A. F. Liu, J. B. Shi, Z. S. Shen, Y. F. Lin, G. B. Qu, Z. S. Zhao and G. B. Jiang, Identification of unknown brominated bisphenol S congeners in contaminated soils as the transformation products of tetrabromobisphenol S derivatives, *Environ. Sci. Technol.*, 2018, **52**, 10480-10489.
3. J. Lan, Z. S. Shen, W. Gao and A. F. Liu, Occurrence of bisphenol-A and its brominated derivatives in tributary and estuary of Xiaoqing River adjacent to Bohai Sea, China, *Mar. Pollut. Bull.*, 2019, **149**, 110551.
4. Y. Q. Jiang, L. Wang, M. G. Zheng, Y. F. Lin, A. F. Liu, Y. W. Wang and Y. Li, Identification of lower brominated bisphenol A analogs as the photooxidation products of tetrabromobisphenol A bis(2,3-dibromopropyl) ether (TBBPA-BDBPE), *Sci. Total Environ.*, 2023, **890**, 164227.
